# Supplementary material
Source: MDPI journal article supplement (https://www.mdpi.com/2073-4344/13/6/941)
Supplement: s1 [file s1 › catalysts-2395139-supplementary.pdf]

## Supporting information

### **Precious Metal-Free CoP Nanorod Electrocatalyst as an Effective Bifunctional Oxygen Electrode for Anion Exchange Membrane-Unitized Regenerative Fuel Cells**

Palanisamy Rajkumar<sup>a†</sup>, Md. Masud Rana<sup>a</sup>, Beom-Soo Kang<sup>a</sup>, Ho-Jung Sun<sup>b</sup>, Gyungse Park<sup>c</sup>, So Yeon Kim<sup>d</sup>, Hong-Ki Lee<sup>c</sup>, Joongpyo Shim<sup>a,\*</sup>

<sup>a</sup>Department of Chemical Engineering, Kunsan National University, Jeonbuk 54150, South Korea

<sup>b</sup>Department of Material Science and Engineering, Kunsan National University, Jeonbuk 54150, South Korea

<sup>c</sup>Department of Chemistry, Kunsan National University, Jeonbuk 54150, South Korea

<sup>d</sup>Department of Chemical Engineering Education & Graduate School of Energy Science and Technology, Chungnam National University, Daejeon 34134, South Korea

<sup>e</sup>Fuel Cell Regional Innovation Center, Woosuk University, Jeonbuk 55315, South Korea

\*Corresponding author: jpshim@kunsan.ac.kr

<sup>†</sup>Current address: Department of Mechanical Engineering, Yeungnam University, Gyeongsan-si 214-1, Gyeongbuk 712-749, South Korea

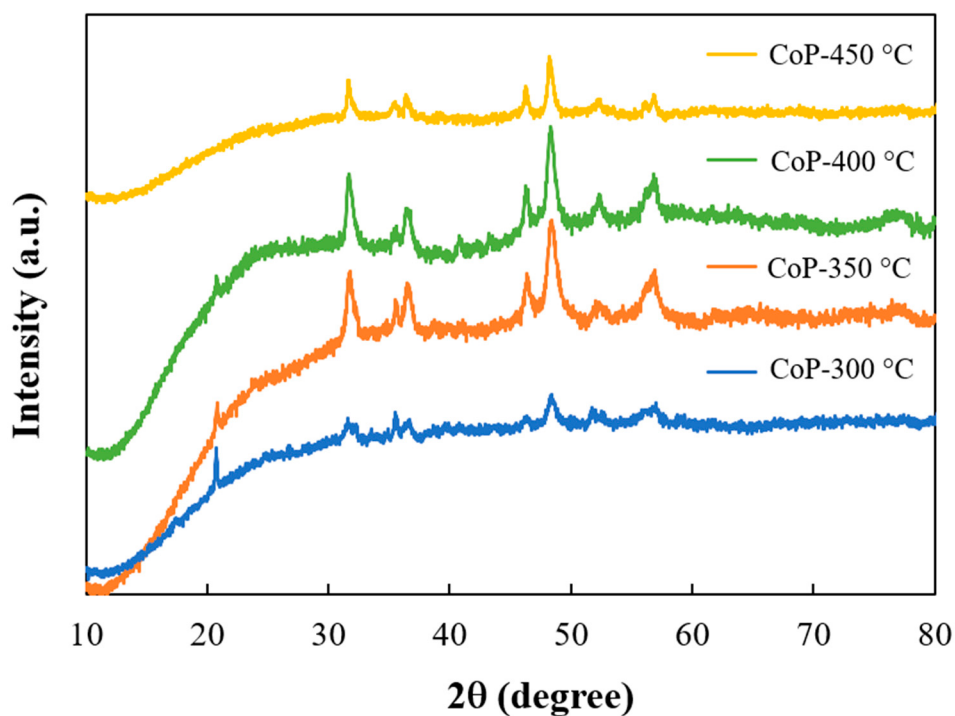

**Figure S1.** XRD patterns of CoP at different temperatures

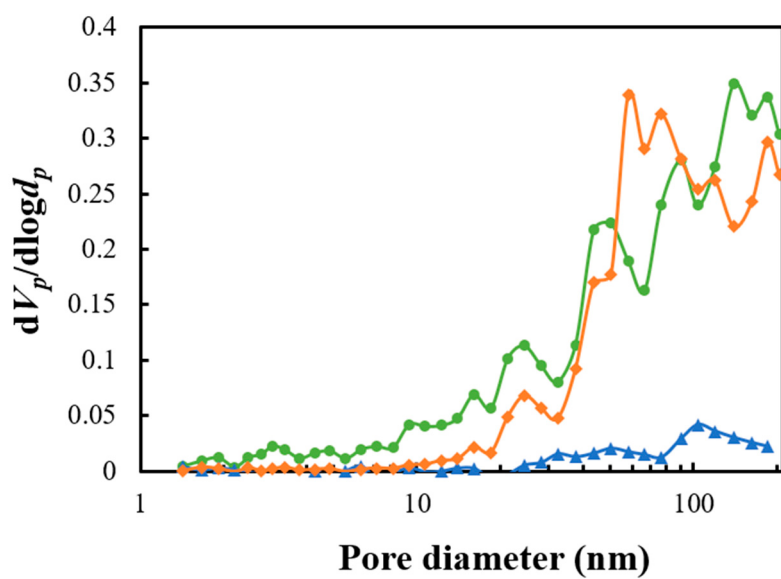

**Figure S2.** Pore size distribution curves of Co(OH)F, CoP and Co<sub>3</sub>O<sub>4</sub>

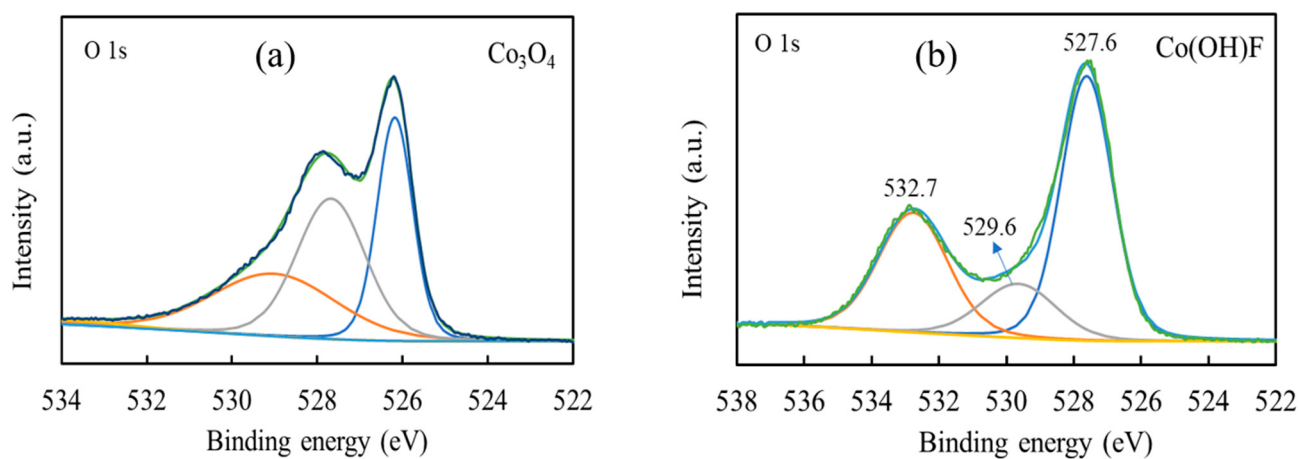

**Figure S3.** Deconvoluted O1s spectra of (a) Co<sub>3</sub>O<sub>4</sub> and (b) Co(OH)F samples

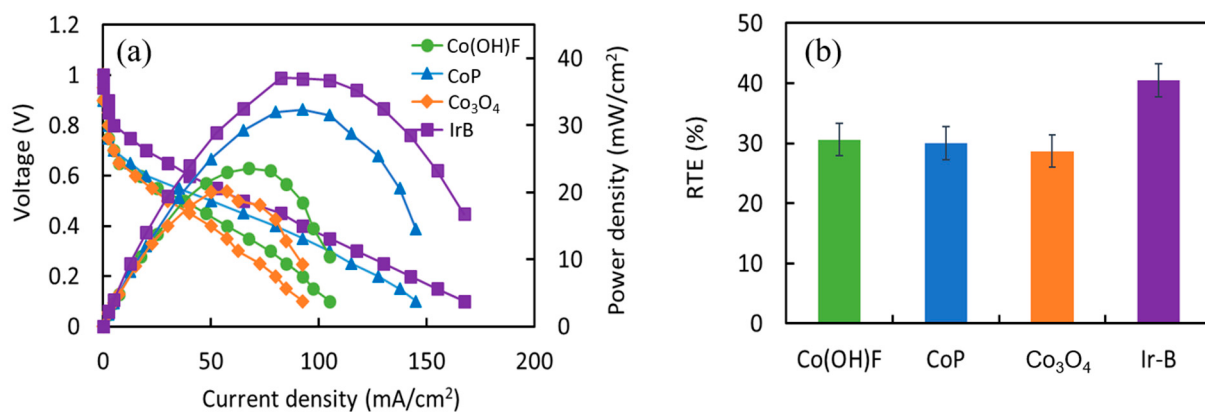

**Figure S4.** (a) Power density and (b) RTE of Co(OH)F, CoP and Co<sub>3</sub>O<sub>4</sub> for fuel cell performance

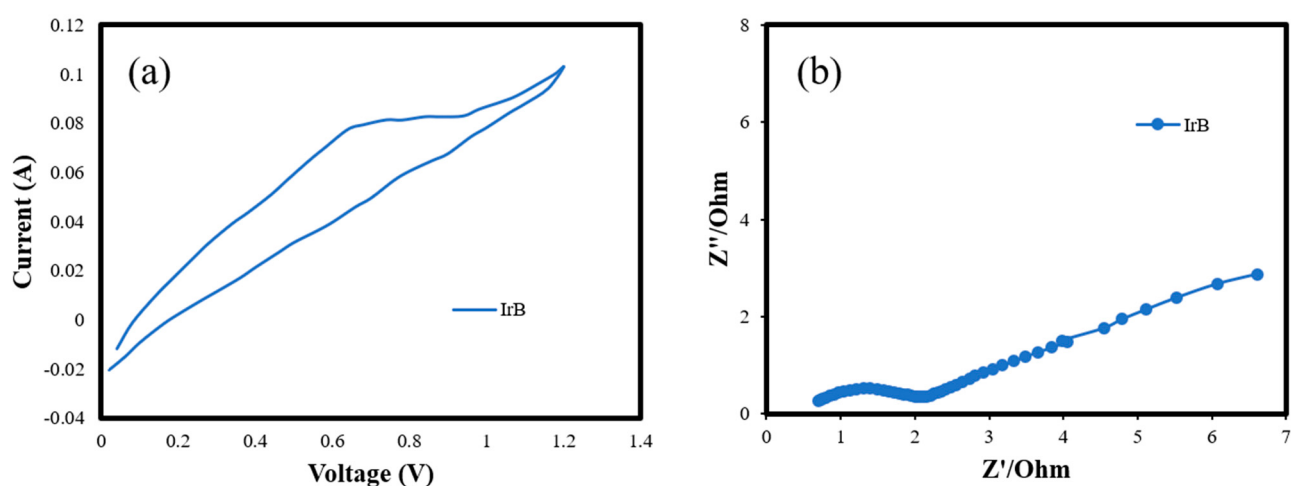

**Figure S5.** After fuel cell mode (a) CV and (b) EIS of IrB sample as Oxygen electrode and Pt/C as hydrogen electrode

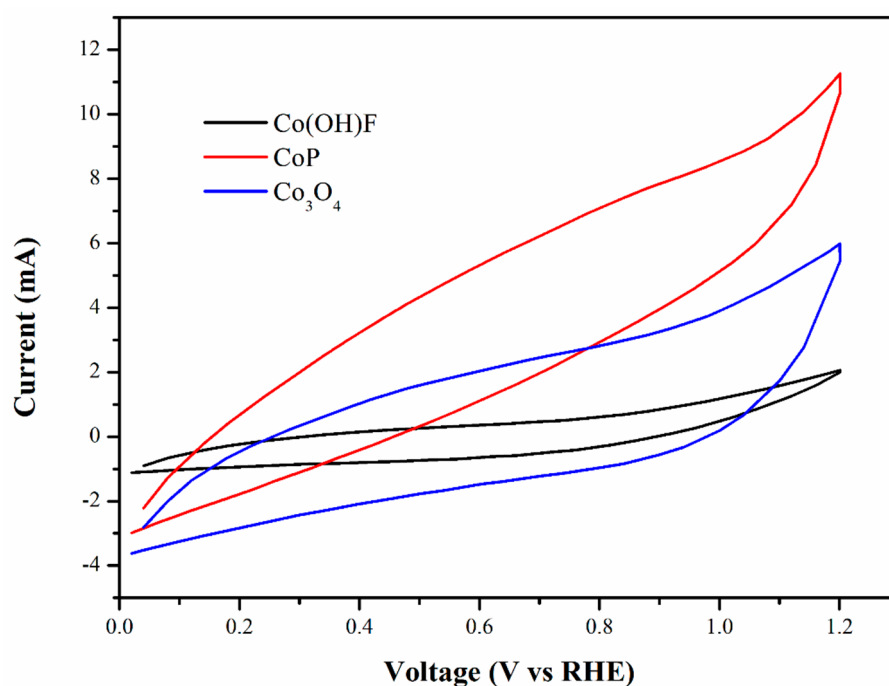

**Figure S6.** 50<sup>th</sup> cycle CV curves of Co(OH)F, CoP and Co<sub>3</sub>O<sub>4</sub> catalysts

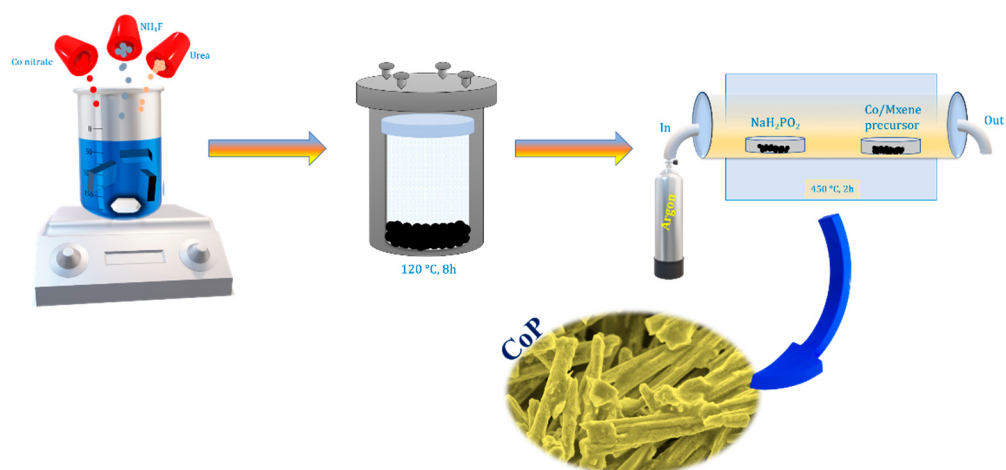

**Figure S7.** Schematic diagram of the preparation procedure

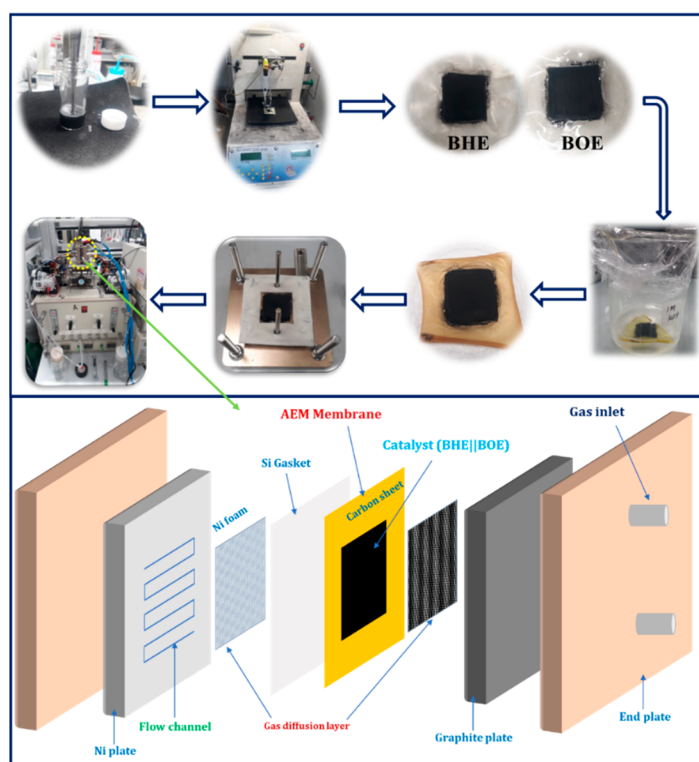

**Scheme S1.** Schematic illustration of MEA preparation and cell assembly
